# Supplementary material for: Dual-Stimuli-Sensitive Smart Hydrogels Containing Magnetic Nanoparticles as Antitumor Local Drug Delivery Systems—Synthesis and Characterization
Source: MDPI journal article supplement (doi:10.3390/ijms24086906), 2023-04-07
Supplement: s1 [file s1]

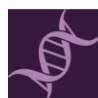

Supplementary Materials

# Dual-Stimuli-Sensitive Smart Hydrogels Containing Magnetic Nanoparticles as Antitumor Local Drug Delivery Systems—Synthesis and Characterization

Adam Kasiński <sup>1</sup>, Agata Świerczek <sup>1</sup>, Monika Zielińska-Pisklak <sup>1</sup>, Sebastian Kowalczyk <sup>2</sup>, Andrzej Plichta <sup>2</sup>, Anna Zgadzaj <sup>3</sup>, Ewa Oledzka <sup>1</sup> and Marcin Sobczak <sup>1,4,\*</sup>

<sup>1</sup> Department of Pharmaceutical Chemistry and Biomaterials, Faculty of Pharmacy, Medical University of Warsaw, Banacha 1 Str., 02-097 Warsaw, Poland

<sup>2</sup> Faculty of Chemistry, Warsaw University of Technology, 3 Noakowskiego Str., 00-664 Warsaw, Poland

<sup>3</sup> Department of Toxicology and Food Science, Faculty of Pharmacy, Medical University of Warsaw, 1 Banacha Str., 02-097 Warsaw, Poland

<sup>4</sup> Military Institute of Hygiene and Epidemiology, 4 Kozielska Str., 01-163 Warsaw, Poland

\* Correspondence: marcin.sobczak@wp.pl or marcin.sobczak@wum.edu.pl

**Table S1.** The results of NRU cytotoxicity tests of PCLA matrices at the highest tested concentration (1 mg/mL).

| Sample  | Cells viability ± SD [%] |
|---------|--------------------------|
| PCLA-A1 | 97 ± 2                   |
| PCLA-A2 | 107 ± 4                  |
| PC      | 2 ± 3                    |
| NC      | 108 ± 4                  |

PC – positive control, latex 10 mg/mL.

NC – negative control, polyethylene foil 50 mg/mL.

**Table S2.** The genotoxicity assay results for PCLA matrices at the highest tested concentration (1 mg/mL).

| Sample           | -S9 <sup>1</sup> |              | +S9 <sup>2</sup> |             |
|------------------|------------------|--------------|------------------|-------------|
|                  | G ± SD           | IR ± SD      | G ± SD           | IR ± SD     |
| PCLA-A1          | 1.18 ± 0.18      | 0.93 ± 0.10  | 1.24 ± 0.19      | 0.70 ± 0.14 |
| PCLA-A2          | 1.12 ± 0.05      | 0.70 ± 0.22  | 1.21 ± 0.01      | 0.72 ± 0.02 |
| Solvent control  | 1.02 ± 0.03      | 0.92 ± 0.17  | 1.00 ± 0.05      | 0.89 ± 0.09 |
| Positive control | 0.74 ± 0.14      | 12.15 ± 1.31 | 0.77 ± 0.07      | 8.41 ± 0.95 |
| Negative control | 1.00 ± 0.06      | 1.00 ± 0.23  | 1.00 ± 0.06      | 1.00 ± 0.09 |

<sup>1</sup> version without metabolic activation

<sup>2</sup> version with metabolic activation

**Table S3.** The visual observation of MIONs sedimentation in water.

| Sample | Time                                                                                |                                                                                     |                                                                                     |                                                                                      |                                                                                       |                                                                                       |
|--------|-------------------------------------------------------------------------------------|-------------------------------------------------------------------------------------|-------------------------------------------------------------------------------------|--------------------------------------------------------------------------------------|---------------------------------------------------------------------------------------|---------------------------------------------------------------------------------------|
|        | 0 h                                                                                 | 2 h                                                                                 | 24 h                                                                                | 48 h                                                                                 | 72 h                                                                                  | 168 h                                                                                 |
| S2     |    |    |    |    |    |    |
| S4     |    |    |    |    |    |    |
| S5     |    |    |    |    |    |    |
| S6     |   |   |   |   |   |   |
| S7     |  |  |  |  |  |  |
| S8     |  |  |  |  |  |  |
| S9     |  |  |  |  |  |  |
| S10    |  |  |  |  |  |  |
| S11    |  |  |  |  |  |  |

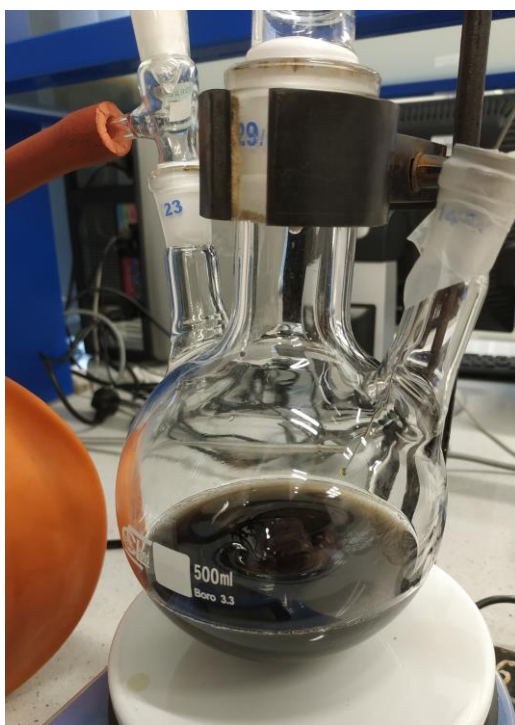

**Figure S1.** An illustration photo of the synthesized MIONs.

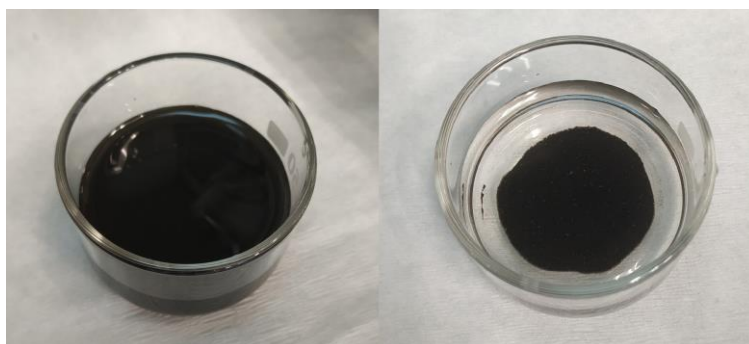

**Figure S2.** MIONs magnetically-assisted sedimentation.
